# Supplementary material for: Self-weaving sulfur–carbon composite cathodes for high rate lithium–sulfur batteries
Source: Royal Society of Chemistry journal article supplement (doi:10.1039/c2cp42796f), 2012-01-01
Supplement: c2cp42796f.pdf [file c2cp42796f.pdf]

## Electronic supplementary information

### Self-Weaving Sulfur–Carbon Composite Cathodes for High Rate Lithium–Sulfur Batteries

Yu-Sheng Su, Yongzhu Fu, and Arumugam Manthiram\*

*Electrochemical Energy Laboratory & Materials Science and Engineering Program*

*The University of Texas at Austin, Austin, Texas 78712, USA*

Fax:1-512-471-7681, Tel:1-512-471-1791; E-mail: rmanth@mail.utexas.edu (A. Manthiram)

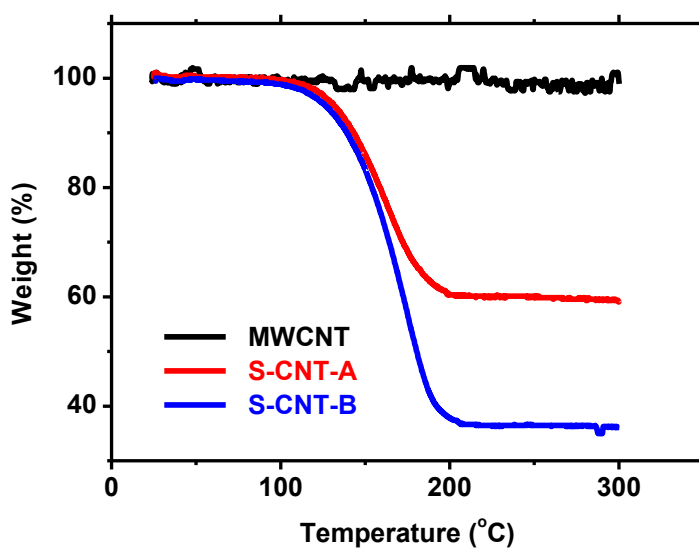

**Fig. S1.** Thermogravimetric analysis of pristine MWCNTs and the self-weaving sulfur–MWCNT composites in flowing air with a heating rate of 10 °C/min, showing 40 wt. % sulfur in the S–CNT–A cathode and 63 wt. % sulfur in the S–CNT–B cathode.

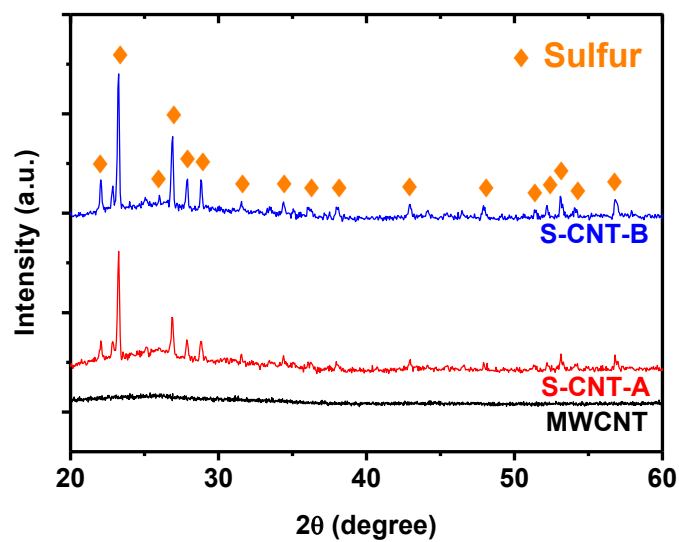

**Fig. S2.** XRD patterns of pristine MWCNTs and the self-weaving sulfur–MWCNT composite cathodes. While the pristine MWCNTs show an amorphous structure, the sulfur in the composite cathodes is well-crystalline.

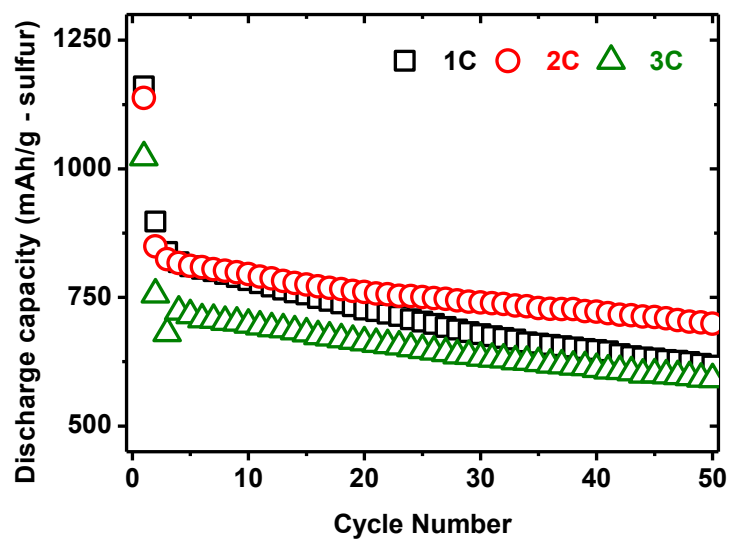

**Fig. S3.** High-rate cycle performance of pure sulfur cathodes (carbon : sulfur = 3 : 2 by wt.) at 1C, 2C, and 3C rates. A severe capacity drop occurs after the first cycle.

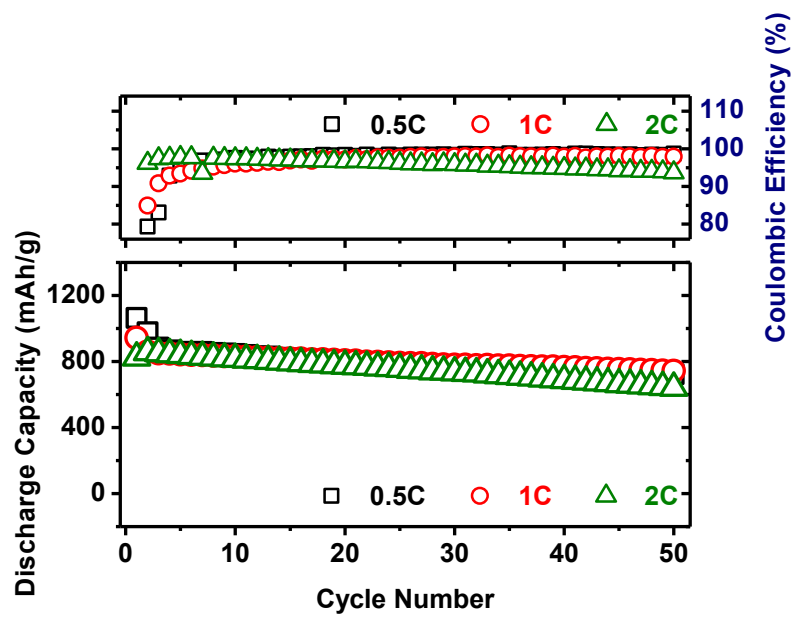

**Fig. S4.** High-rate cycle performance (bottom half) and Coulombic efficiency (upper half) of the S-CNT-B cathode at 0.5C, 1C, and 2C rates.
